# Supplementary material
Source: Springer Nature journal article supplement (https://www.springermedizin.de/resource/supplementary/12943_2009_559_MOESM8_ESM.pdf/9554970)
Supplement: MOESM8 [file 9554970]

Aglient, Human CpG Island Chip on chip 244k array , on 5 primary ALL samples

237,220 probes, 27,800 CpG islands

237,220 probes

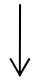

Removed probes methylated 0,1,2 times

9304 probes

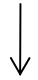

Removed probes not labelled 'Promoter'

2465 probes

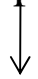

Removed unidentified regions and microRNAs

2022 probes/1086 genes

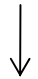

Removed genes with only one promoter probe

398 genes
